# Supplementary material
Source: PubMed Central journal article supplement (PMC7811496)

## Figure S1 Schematic outline of the study

Selection of four rice genotypes contrasting for their performance under low and recommended N field conditions, their evaluation for three years and their Transcriptome studies using 454 and Illumina platforms for *de novo* assembly and analyses

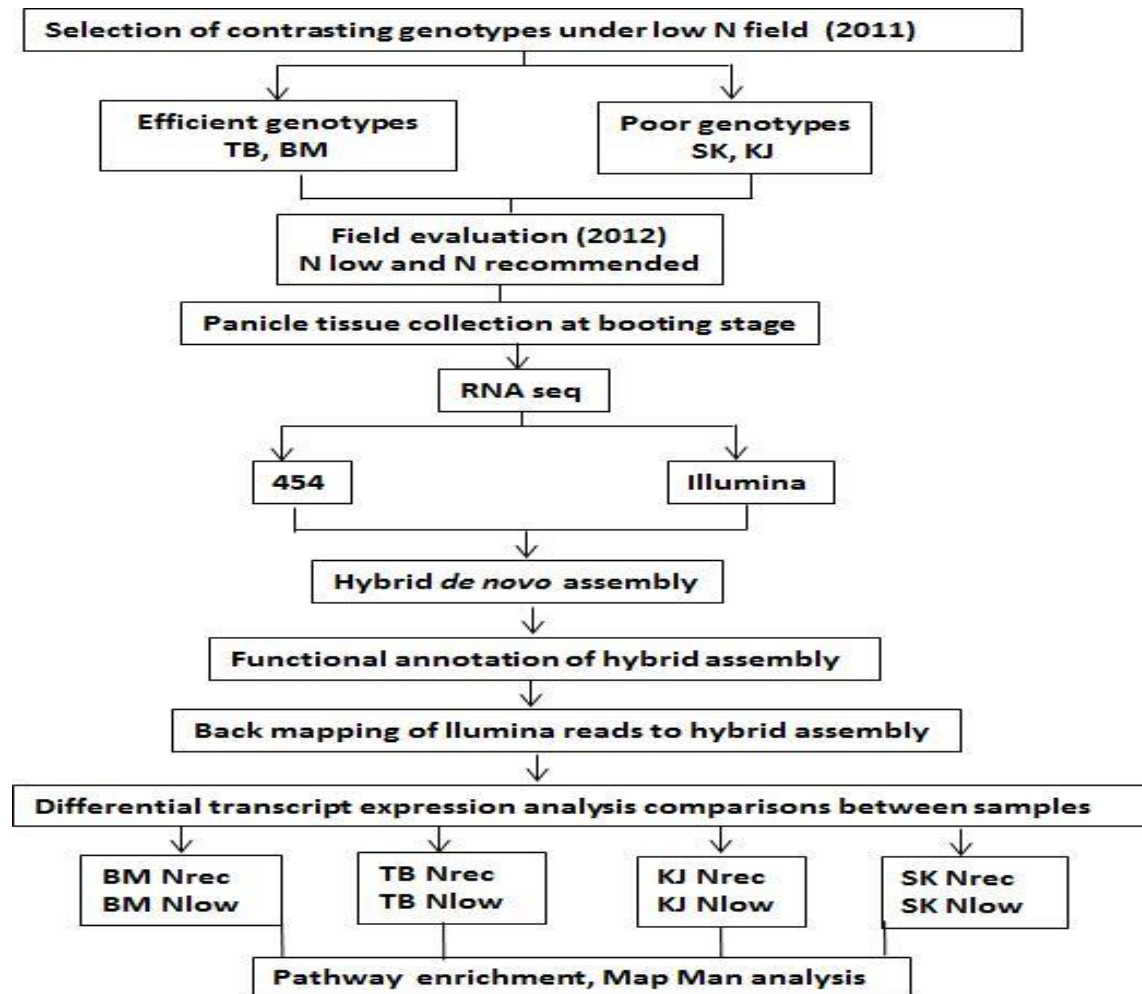

Supplement: 13205_2020_2631_MOESM14_ESM.pdf [file 13205_2020_2631_MOESM14_ESM.pdf]
