# Supplementary material
Source: PubMed Central journal article supplement (PMC7811496)

## Figure S2 Significant DETs in efficient and poor genotypes

Number of differentially expressed transcripts responsive two efficient (TB: ThururBhog and BM: Basmati 370) and poor (SK: Surkasha and KJ: Kola Joha) genotypes under low and recommended N conditions; blue represents up regulated while red represents down regulated genes

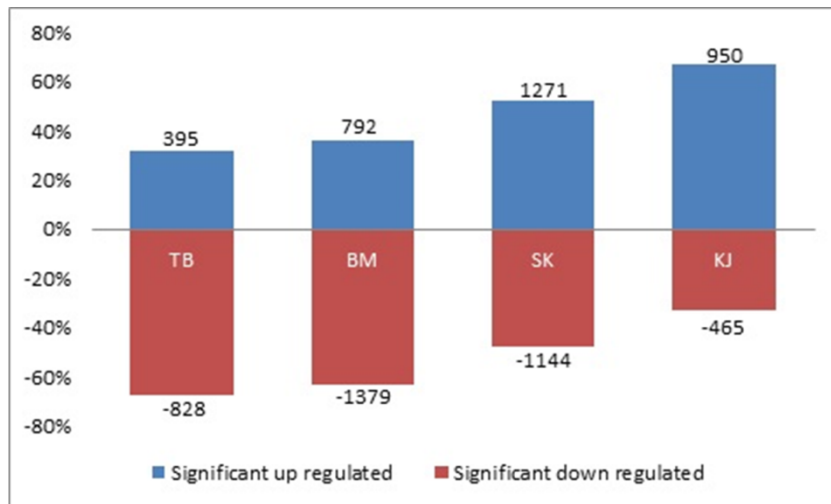

Supplement: 13205_2020_2631_MOESM15_ESM.pdf [file 13205_2020_2631_MOESM15_ESM.pdf]
