# Supplementary material
Source: PubMed Central journal article supplement (PMC7811496)
Supplement: 13205_2020_2631_MOESM16_ESM.pdf [file 13205_2020_2631_MOESM16_ESM.pdf]

Supplementary Figure 1. Gene ontology analyses of two efficient genotypes (TB: Thurur Bhog and BM: Basmati 370) and two poor genotypes (KJ: Kola Joha and SK: Suraksha under low N field conditions in comparison to recommended N. **a**, WEGO analyses of down regulated transcripts of efficient genotypes. **a**, WEGO analyses of down regulated transcripts of the efficient genotypes. **b**, WEGO analyses of up regulated transcripts of efficient genotypes. **c**, WEGO analyses of down regulated transcripts of poor genotypes. **d**, WEGO analyses of up regulated transcripts of poor genotypes

Supplementary figure. 1a

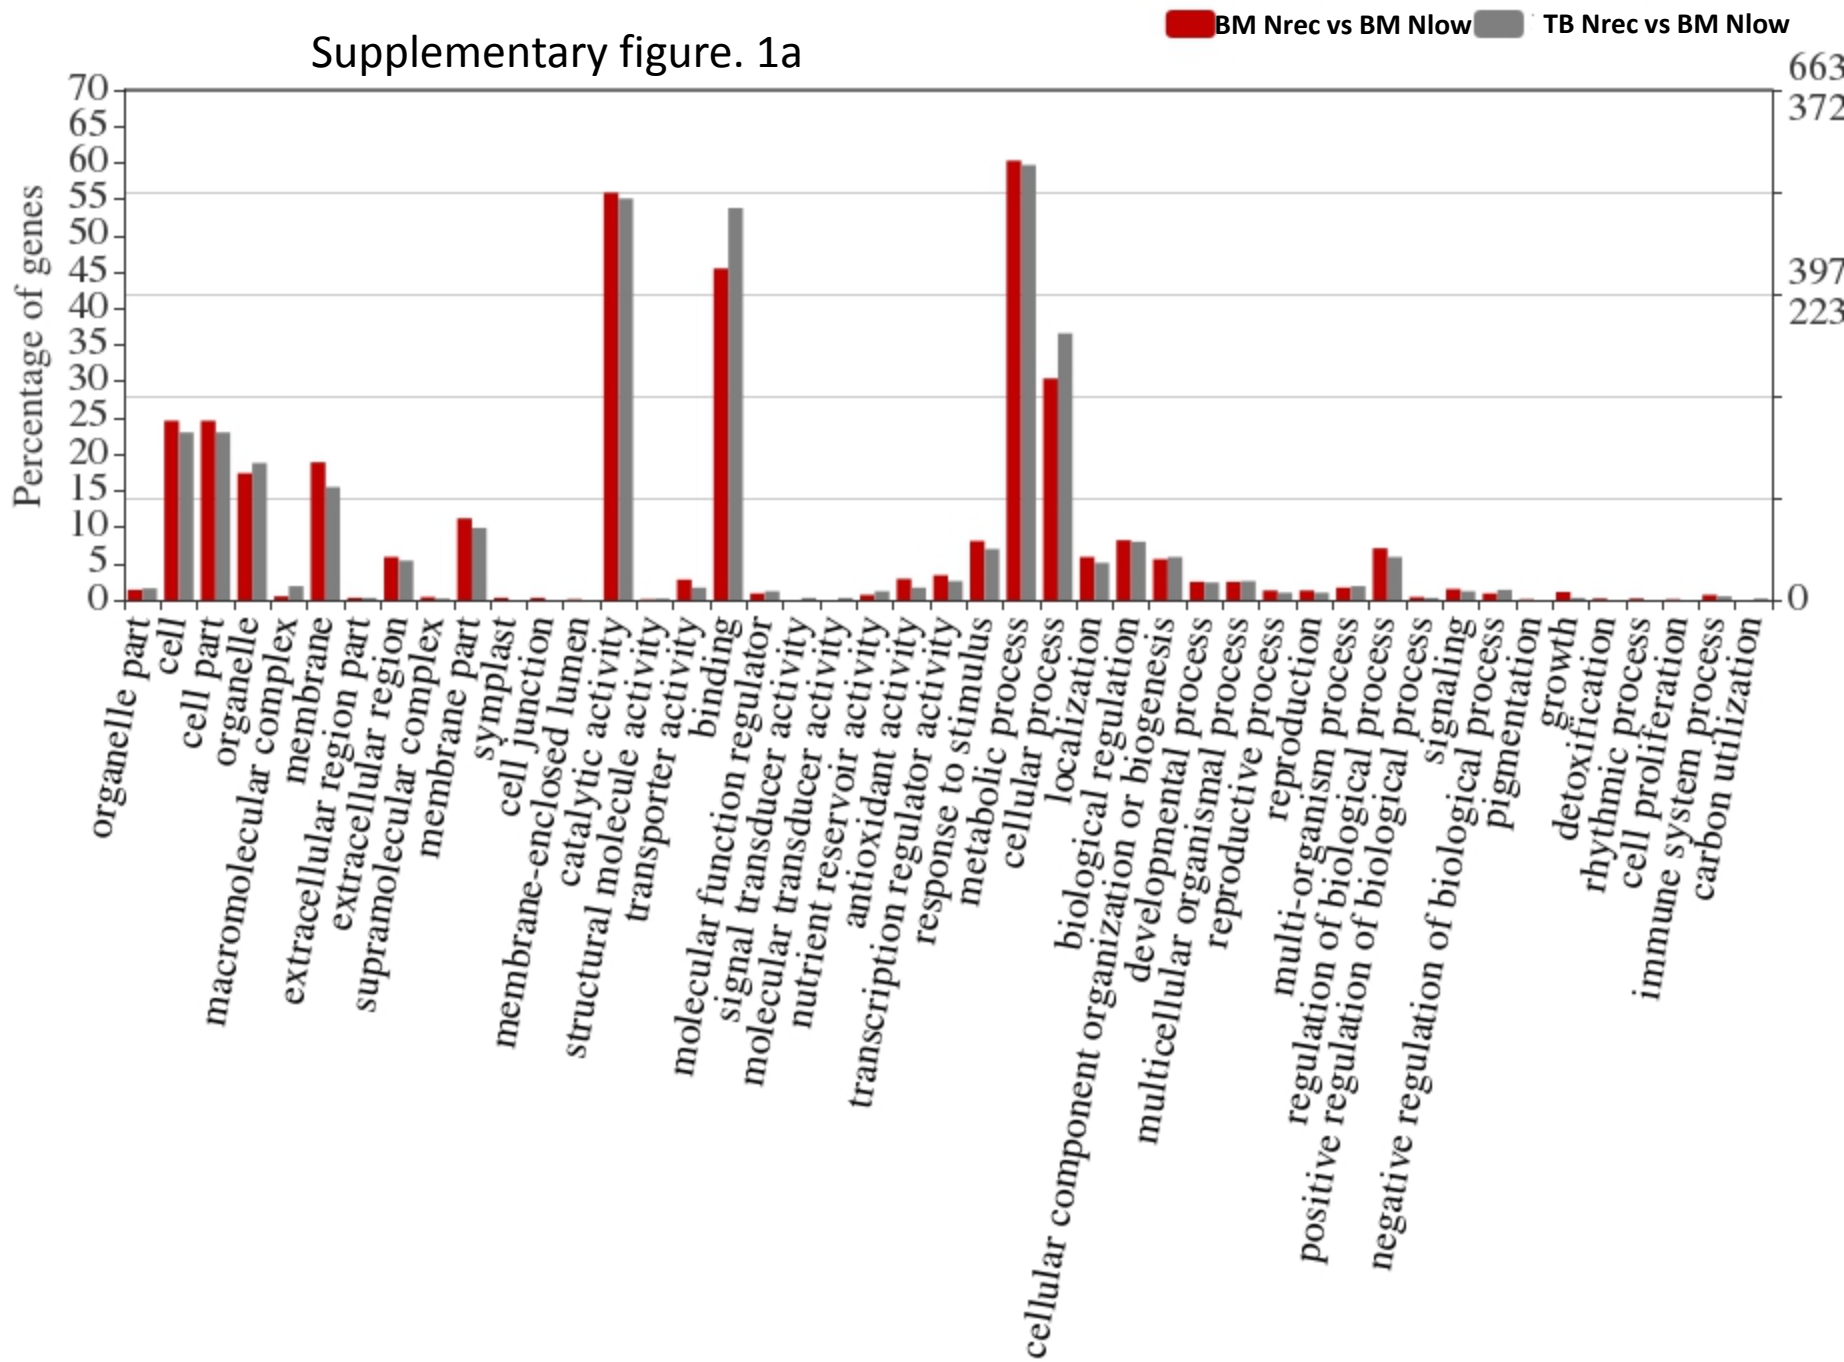

Supplementary figure. 1b

TB Nrec vs TB Nlow BM Nrec vs BM Nlow

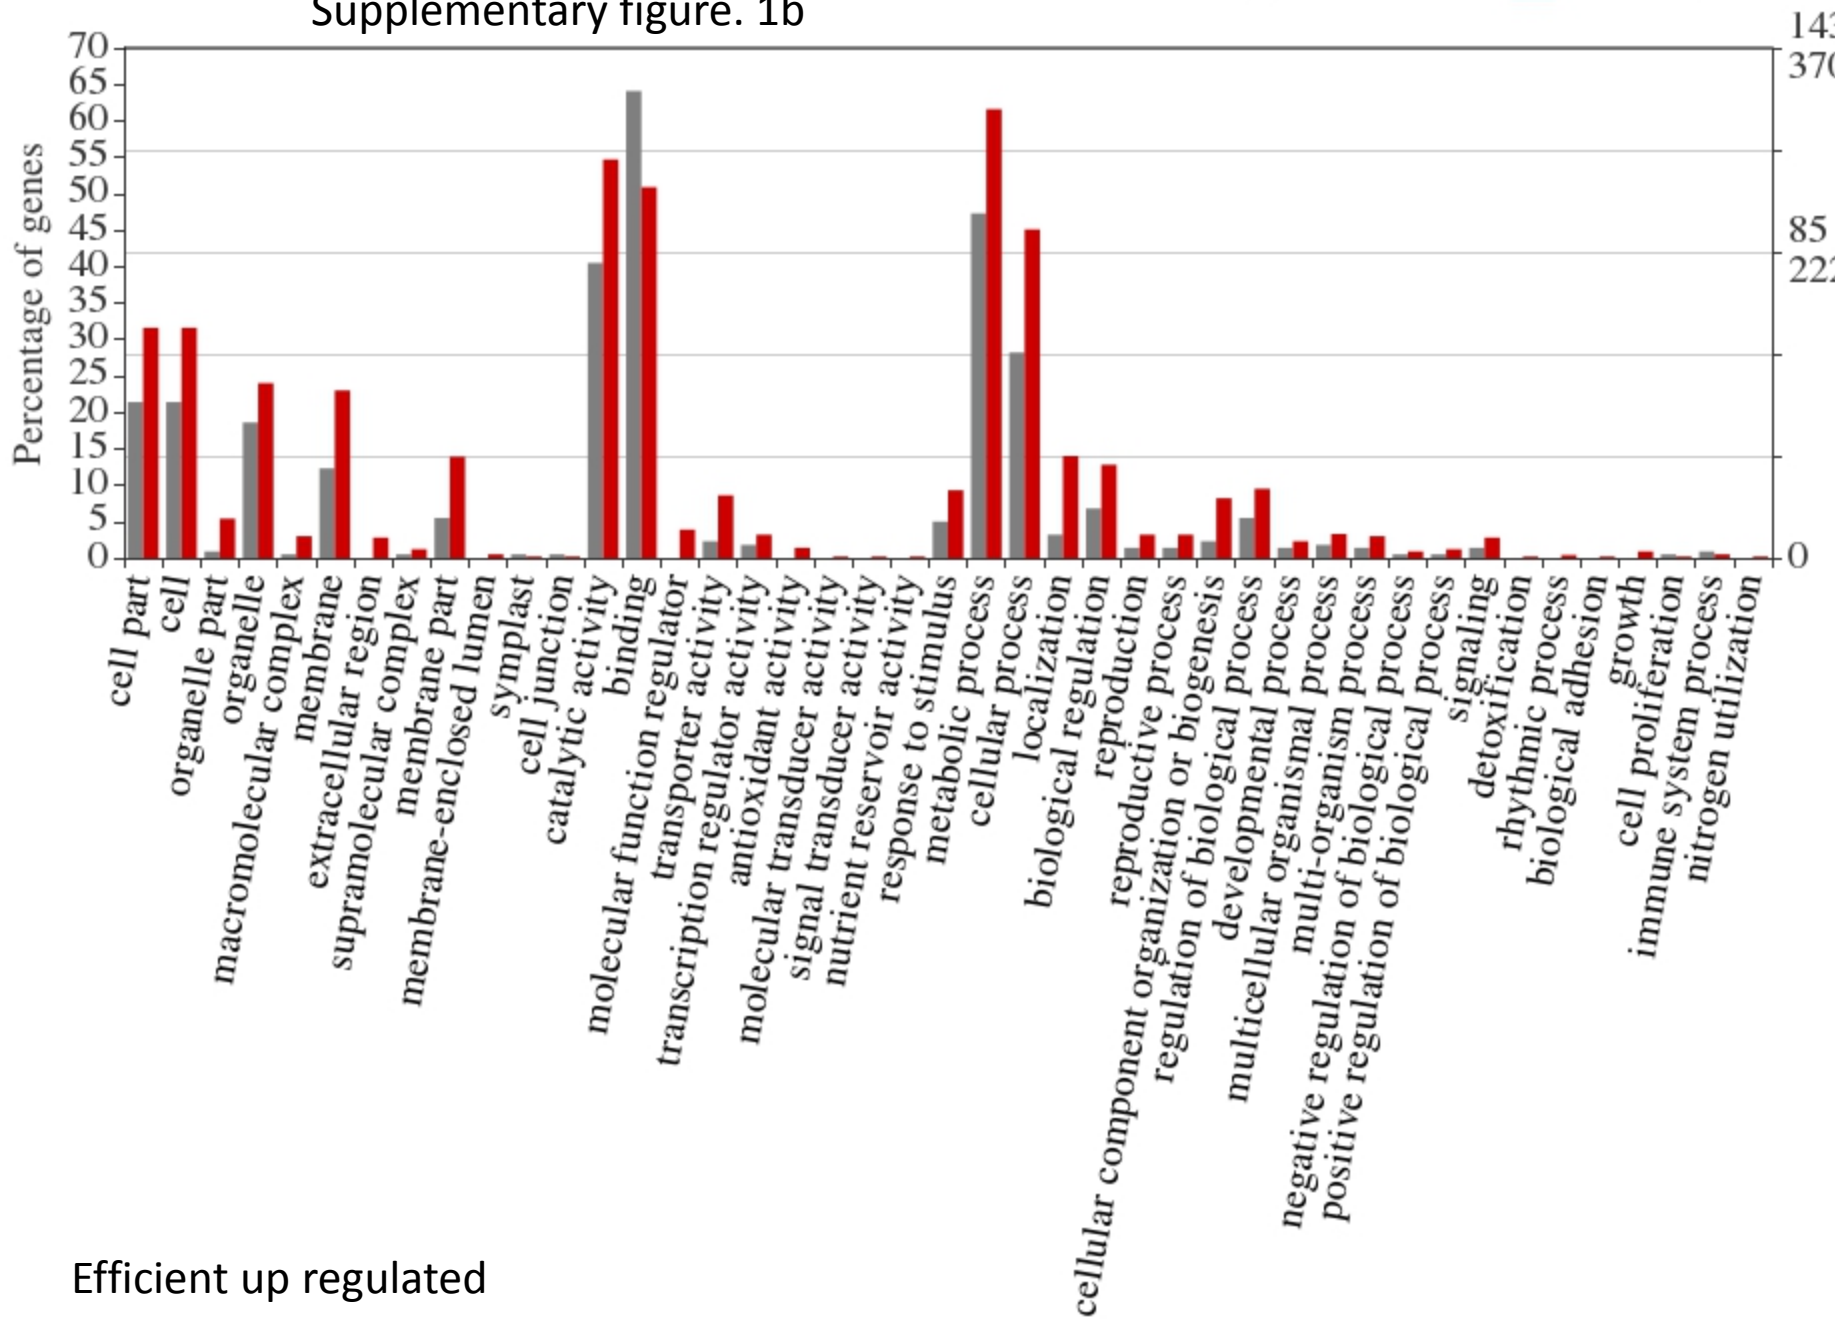

Efficient up regulated

Supplementary figure. 1c

KJ Nrec vs KJ Nlow SK Nrec vs SK Nlow

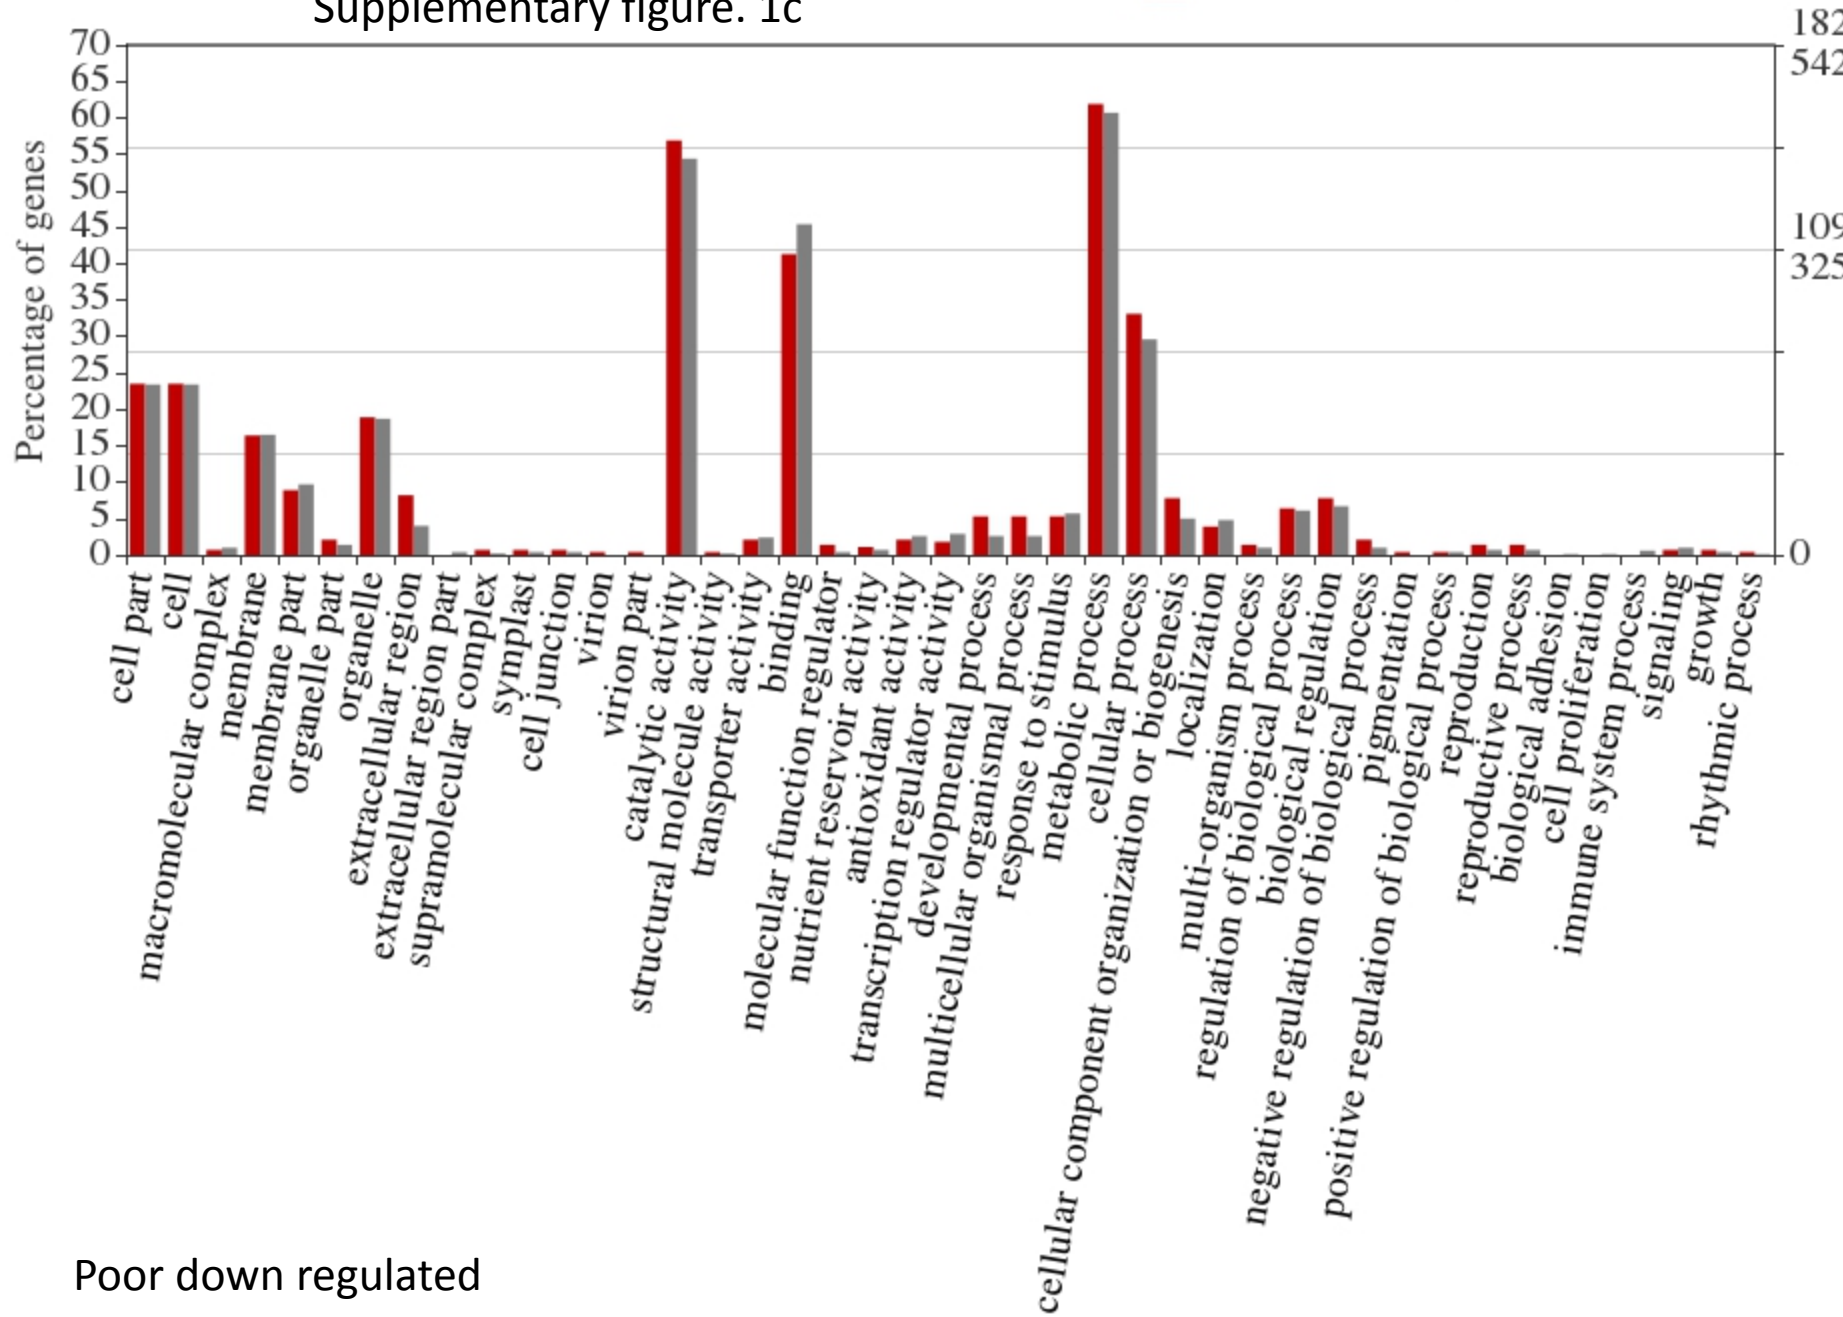

Poor down regulated

Supplementary figure. 1d

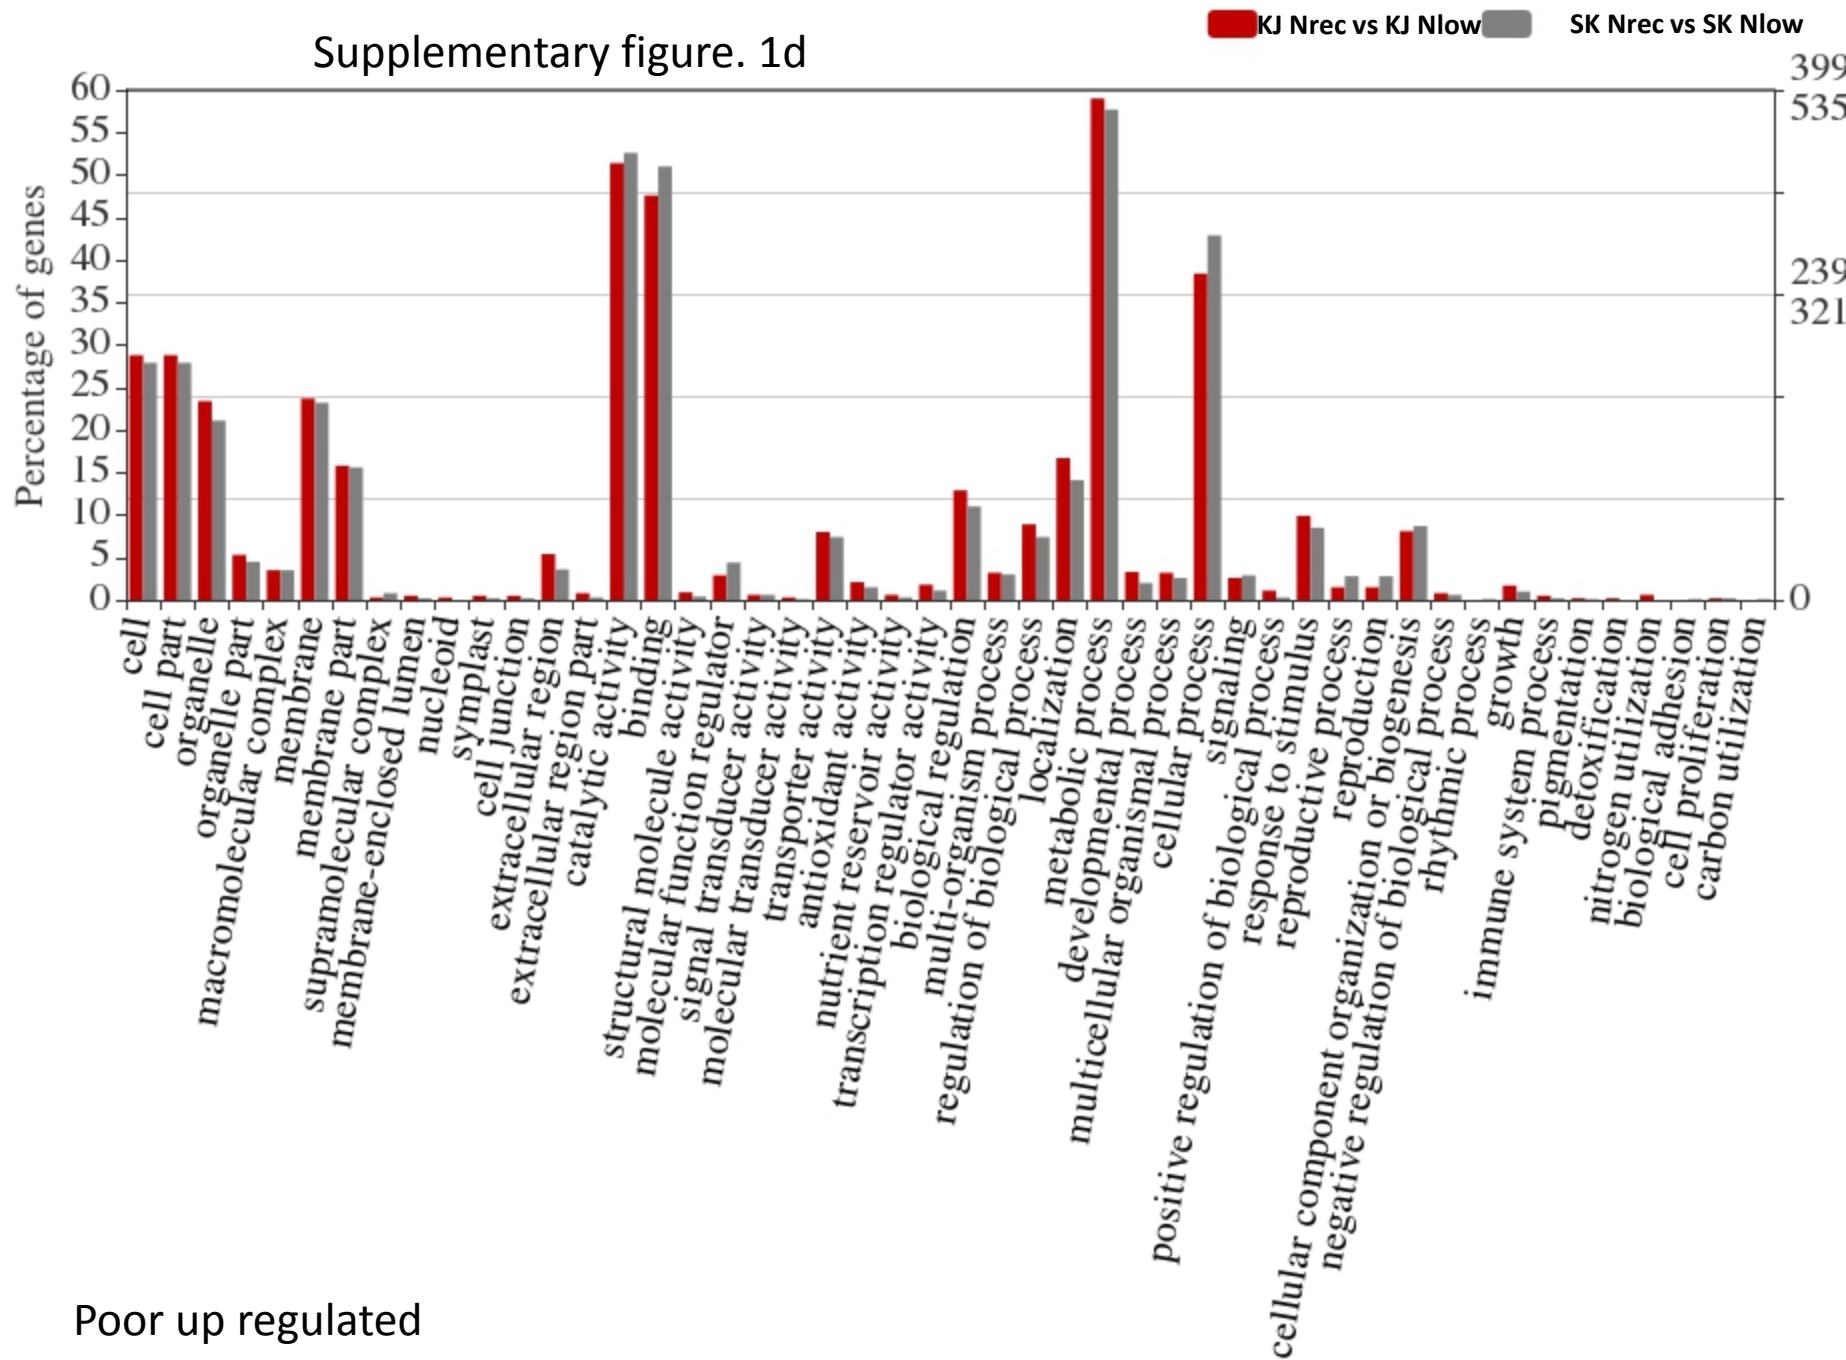

Poor up regulated
