# Supplementary material
Source: PubMed Central journal article supplement (PMC7811496)

## Figure S4 MapMan overview of plant metabolic pathways

The up and down regulation of transcripts in (A) efficient genotype – ThuruBhog, (B) poor genotype – Kola Joha under low N conditions. Statistically significant (P-value cut-off of  $\leq 0.05$ ) are represented by false colour heat map where blue represents down regulation and red represents up regulation

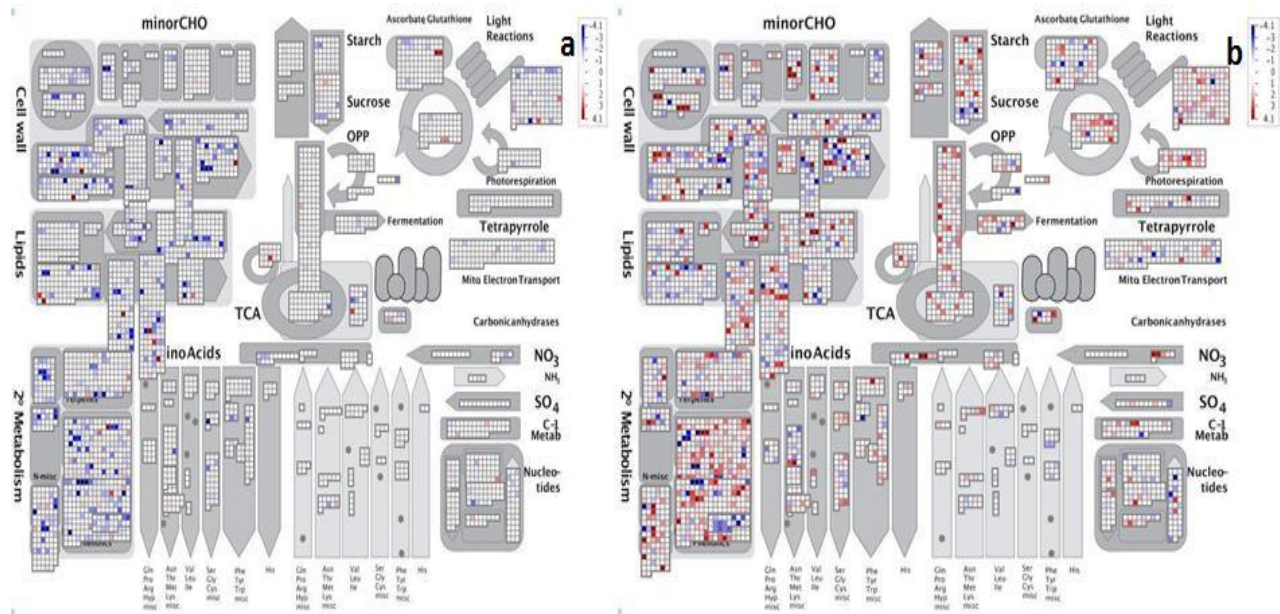

Supplement: 13205_2020_2631_MOESM17_ESM.pdf [file 13205_2020_2631_MOESM17_ESM.pdf]
