# Supplementary material
Source: PubMed Central journal article supplement (PMC7811496)

## Figure S5 Heat map of DETs of transcription factors and transporters in efficient and poor genotypes

Visualization of up regulated and down regulated unique and common DETs of transcription factors (TF) and transporters identified between the efficient and poor genotypes under low N conditions (green colour indicates low expression whereas red colour indicates high expression) represented using  $\log_2$  scale. (A) up regulated TFs in the efficient genotypes, (B) down regulated TFs in the efficient genotypes, (C) down regulated TFs in the poor genotypes, (D) up regulated TFs in the poor genotypes, (E) up regulated transporters in the efficient genotypes, (F) down regulated transporters in the efficient genotypes, (G) down regulated transporters in the poor genotypes, (H) up regulated transporters in the poor genotypes

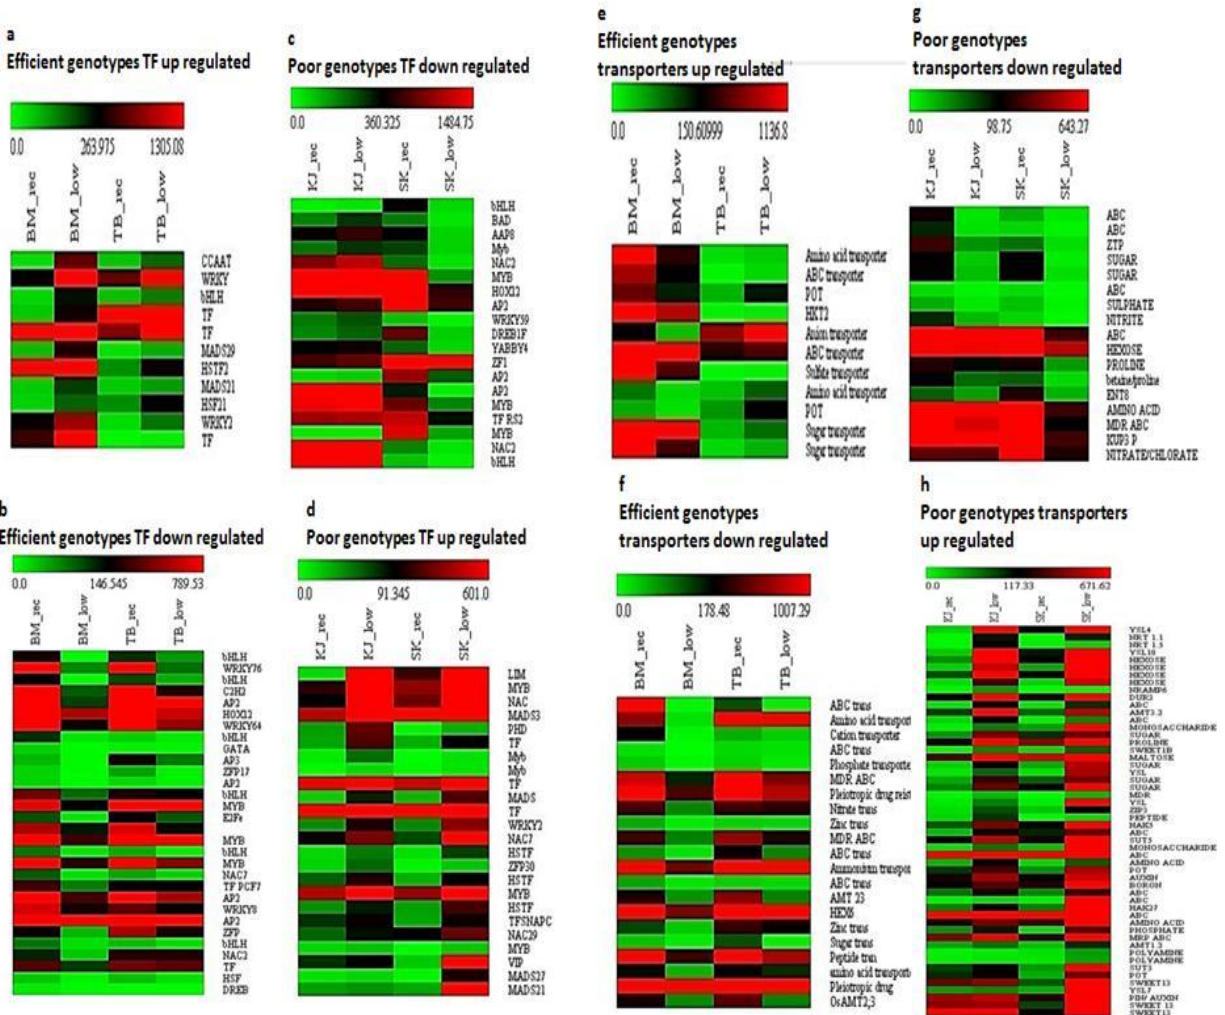

Supplement: 13205_2020_2631_MOESM18_ESM.pdf [file 13205_2020_2631_MOESM18_ESM.pdf]
