# Supplementary material
Source: PubMed Central journal article supplement (PMC7811496)

Fold changes in four genotypes using qPCR Based on 52 DETs of RNA-seq. N Recommended was considered as control and N low was taken as treated. Efficient genotypes: ThururBhog (TB), Basmati 370 (BM) and non-efficient - Suraksha (SK) and Kola Joha (KJ)

a. TB Nlow and TB Nrec

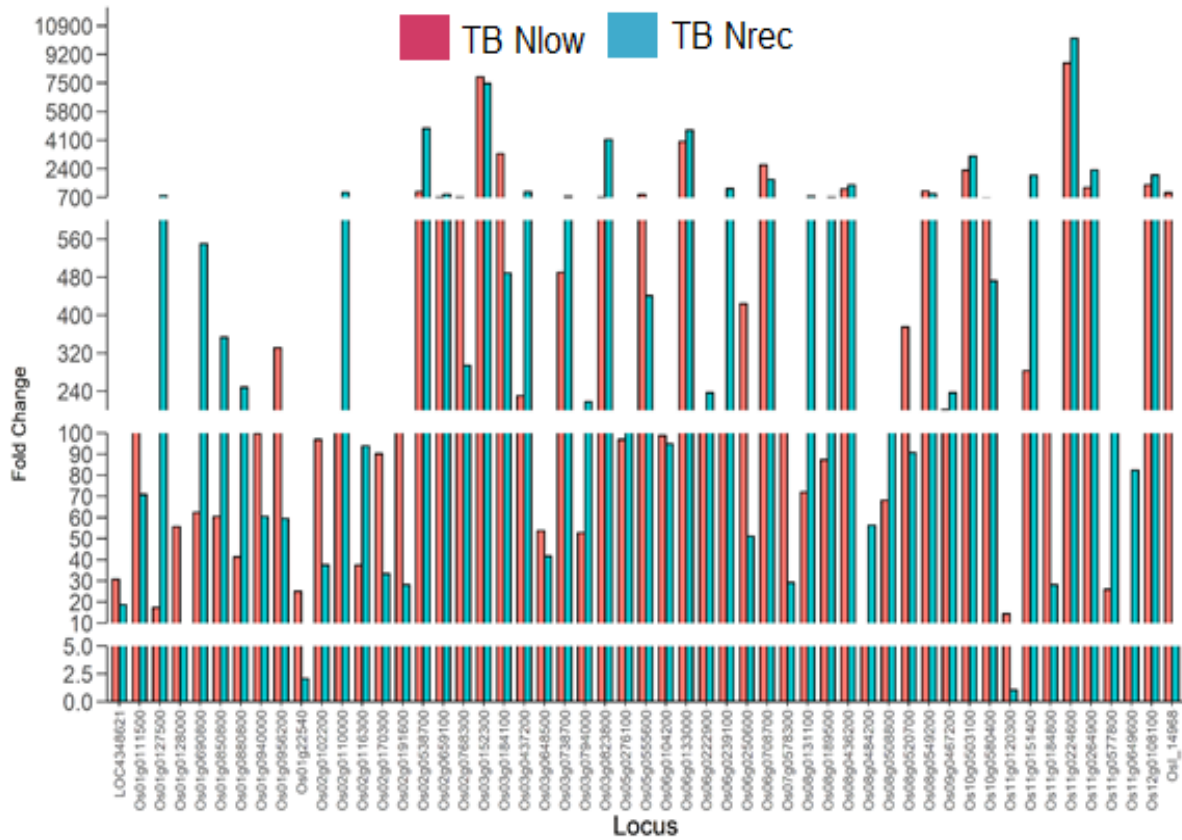

b. BM Nlow and BM Nrec

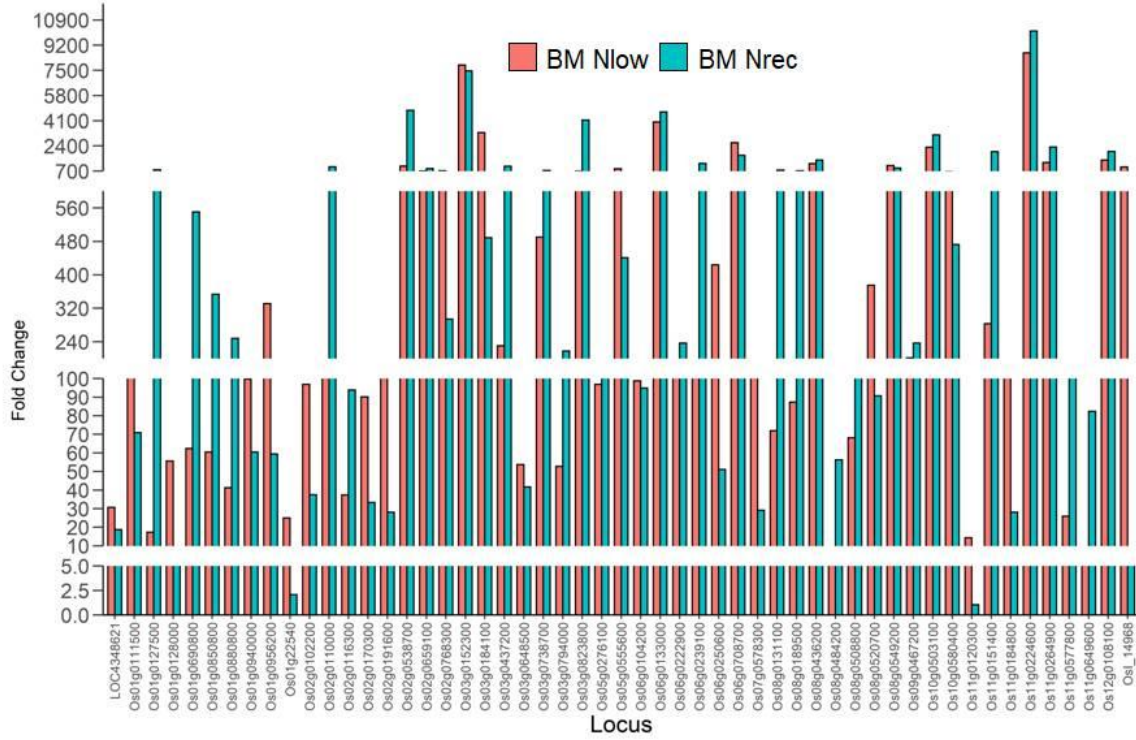

c. SK Nlow and SK Nrec

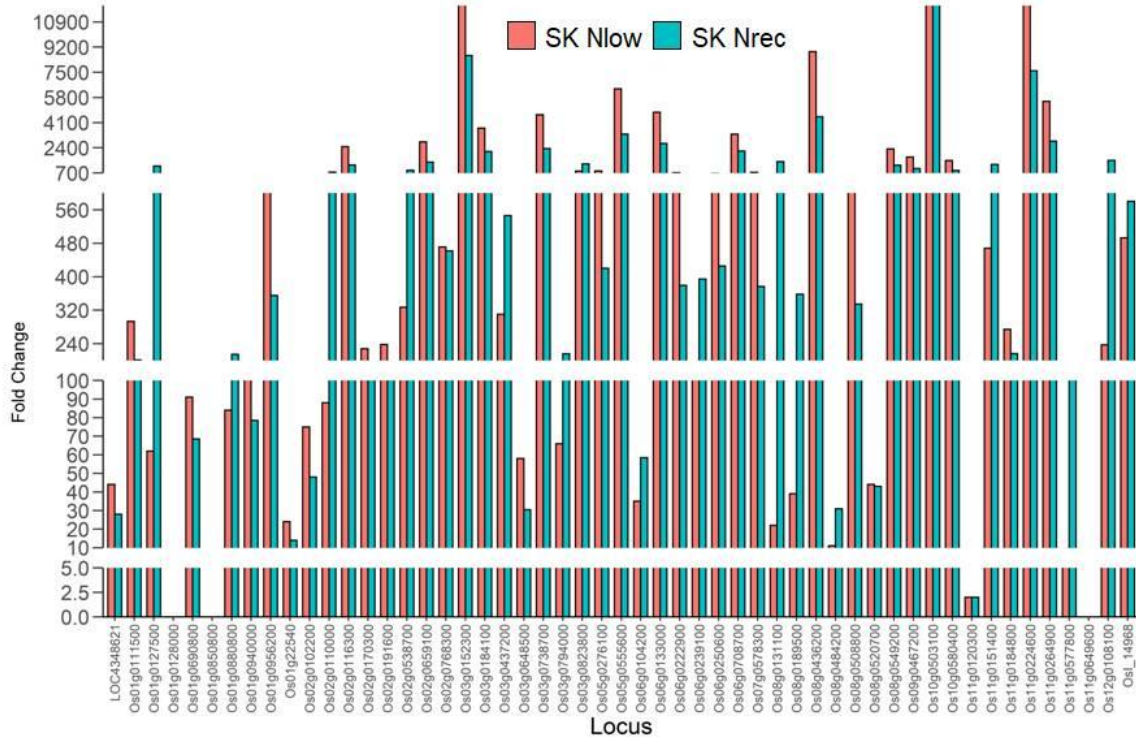

d. KJ Nlow and KJ Nrec

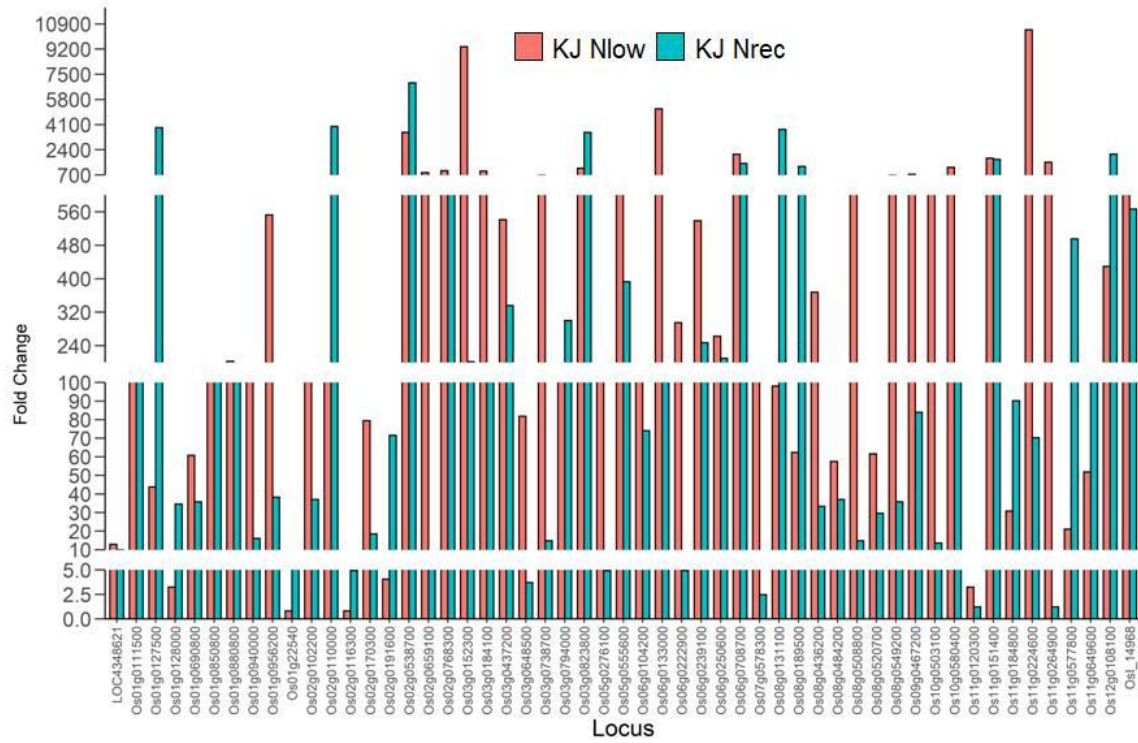

Supplement: 13205_2020_2631_MOESM19_ESM.pdf [file 13205_2020_2631_MOESM19_ESM.pdf]
